# Supplementary material for: A hierarchically structured anatase-titania/indium-tin-oxide nanocomposite as an anodic material for lithium-ion batteries
Source: Royal Society of Chemistry journal article supplement (doi:10.1039/c7ce00903h), 2017-01-01
Supplement: c7ce00903h1.pdf [file c7ce00903h1.pdf]

## Electronic Supporting Information

### A hierarchically structured anatase-titania/indium-tin-oxide nanocomposite as an anodic material for lithium-ion battery

Yan Luo, Yiming Zhang and Jianguo Huang\*

*Department of Chemistry, Zhejiang University, Hangzhou, Zhejiang 310027, China*

*E-mail: jghuang@zju.edu.cn*

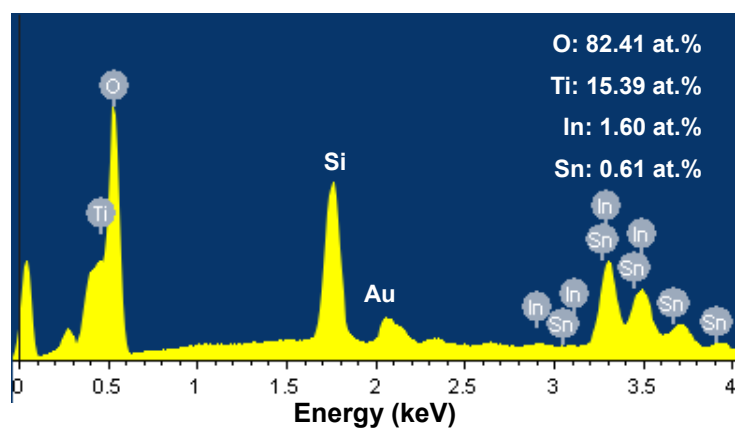

**Fig. S1** Energy dispersive X-ray (EDX) microanalysis report of the anatase-titania/indium-tin-oxide nanocomposite. Si peaks come from silicon wafer substrate to support the specimens, and Au peaks come from Au-coating used to increase conductivity to make SEM observations possible.
